# Supplementary material
Source: publisher figshare collection journal article supplement (https://acs.figshare.com/ndownloader/files/4646566)

## Synopsis

### Crystal engineering in complexes of propane-1,2,3-tricarboxylic acid ( $H_3tca$ ) with lanthanide(III) cations

Laura Cañadillas-Delgado, Oscar Fabelo, Jorge Pasán, Fernando S. Delgado Mariadel Déniz, Eliezer Sepúlveda, María-Milagros Laz, Miguel Julve and Catalina Ruiz-Pérez\*

The knowledge of the supramolecular network of the propane-1,2,3-tricarboxylic acid ( $H_3tca$ ) [tricarballic acid (**1**)], induced us to look for new architectures of  $tca$ -containing lanthanide(III) cations. Three novel complexes of formulae  $[Ln(tca)(H_2O)_3]_n \cdot nH_2O$  with  $Ln = Gd$  (**2**) and  $Eu$  (**3**), and  $[La_2(tca)_2(H_2O)_5]_n \cdot 4nH_2O$  (**4**) have been synthesized and their structures characterized by X-ray diffraction on single crystals.

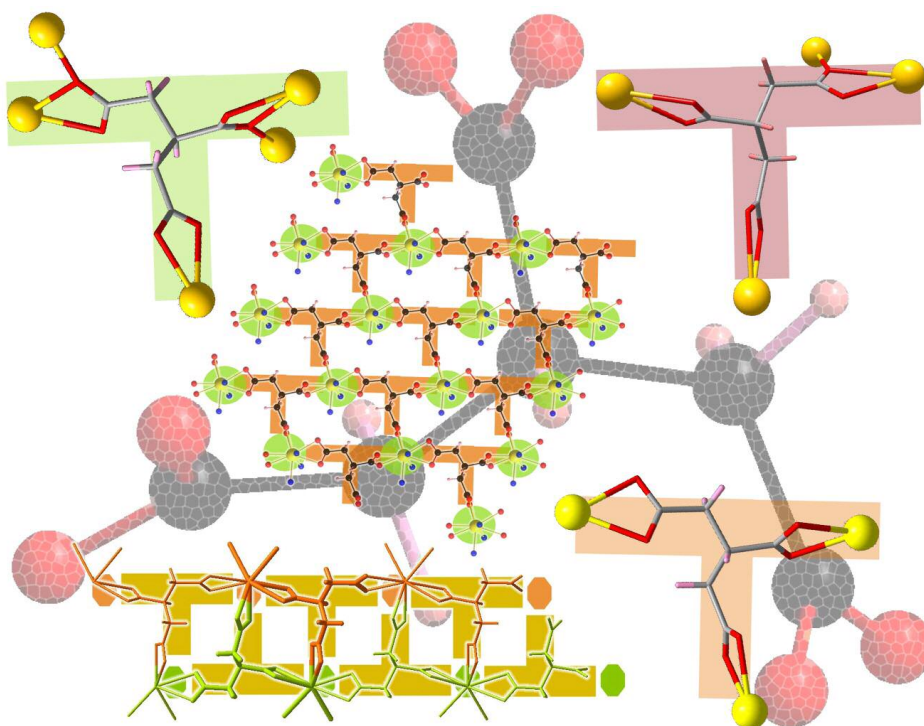

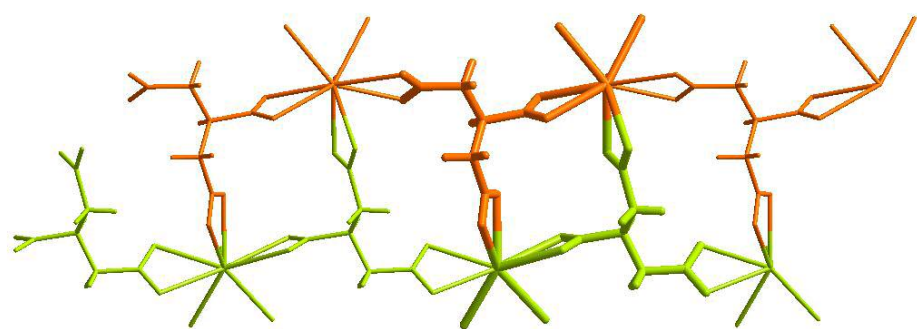

Supplement: Supplementary file 1 [file 4646566]
